# Supplementary material for: In situ encapsulating cobalt phosphide into a quasi-MOF: a high-performance catalyst for hydrolytic dehydrogenation of ammonia borane
Source: Royal Society of Chemistry journal article supplement (doi:10.1039/d2nj05443d), 2023-01-01
Supplement: d2nj05443d1.pdf [file d2nj05443d1.pdf]

## Supporting Information for

# In situ encapsulating cobalt phosphide into quasi-MOF: A high-performance catalyst for hydrolytic dehydrogenation of ammonia borane

Shiyu Yang <sup>a,b</sup>, Ping He <sup>a,\*</sup>, Yao Tian <sup>a,b</sup>, Yang Luo <sup>a,b</sup>, Jing Jiang <sup>b,\*</sup>

<sup>a</sup> *Chemical Synthesis and Pollution Control Key Laboratory of Sichuan Province, College of Chemistry and Chemical Engineering, China West Normal University, Nanchong 637002, China*

<sup>b</sup> *College of Materials Science and Engineering, Chongqing Jiaotong University, Chongqing 400074, China*

\* Corresponding author.

*E-mail address:* hp10004@163.com (P. He), 0826zjjh@163.com (J. Jiang)

### *Synthesis of quasi-Co-MOF-74*

For the synthesis of quasi-Co-MOF-74, the Co-MOF-74 powders were placed in a porcelain boat and heated at 300 °C with a heating rate of 5 °C min<sup>-1</sup> for 2 h under nitrogen atmosphere.

### *Synthesis of CoP@C*

The Co-MOF-74 powders were placed in a porcelain boat and annealed at 600 °C for 2 h at a heating rate of 5 °C min<sup>-1</sup> under nitrogen atmosphere to obtain Co@C. Afterwards, the prepared Co@C powders were placed in a porcelain boat with NaH<sub>2</sub>PO<sub>2</sub>·H<sub>2</sub>O ( $m_{\text{NaH}_2\text{PO}_2\cdot\text{H}_2\text{O}} : m_{\text{Co@C}} = 10 : 1$ ) at the upstream and annealed at 300 °C for 2 h with a heating rate of 5 °C min<sup>-1</sup> under nitrogen atmosphere.

## Synthesis of CoP

The Co-MOF-74 powders were placed in a crucible and annealed at 400 °C for 2 h at a heating rate of 5 °C min<sup>-1</sup> to obtain Co<sub>3</sub>O<sub>4</sub>. Afterwards, the prepared Co<sub>3</sub>O<sub>4</sub> powders were placed in a porcelain boat with NaH<sub>2</sub>PO<sub>2</sub>·H<sub>2</sub>O ( $m_{\text{NaH}_2\text{PO}_2 \cdot \text{H}_2\text{O}} : m_{\text{Co}_3\text{O}_4} = 10 : 1$ ) at the upstream and annealed at 300 °C for 2 h with a heating rate of 5 °C min<sup>-1</sup> under nitrogen atmosphere.

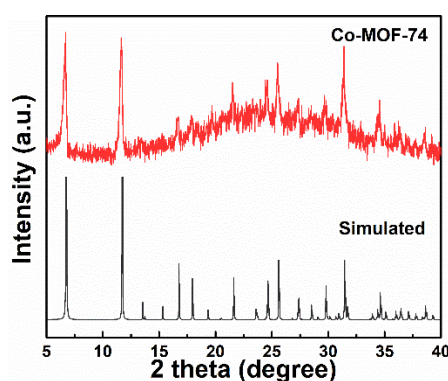

**Fig. S1** XRD patterns of simulated and as-prepared Co-MOF-74 (simulated pattern is obtained from the cif document: CCDC 270292).

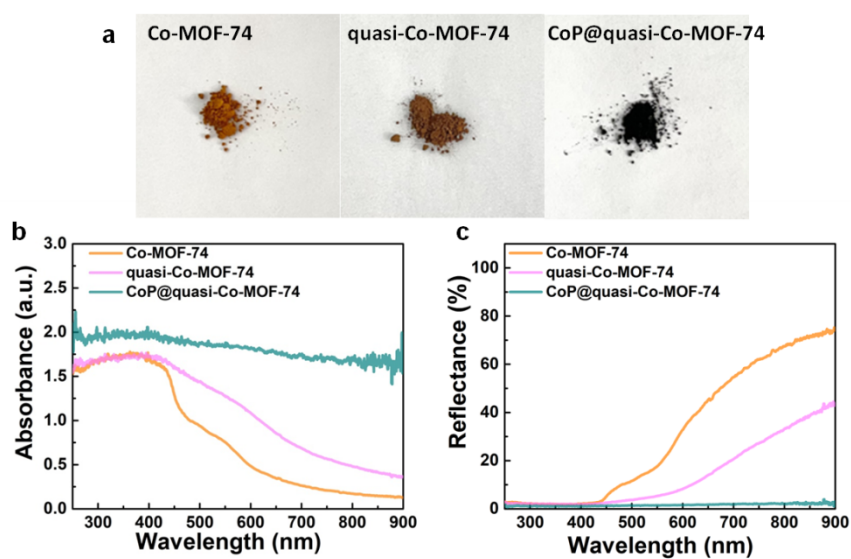

**Fig. S2** (a) Photographs of Co-MOF-74, quasi-Co-MOF-74 and CoP@quasi-Co-MOF-74. (b) Diffuse reflectance spectra and (c) Kubelka-Munk transformed diffuse reflectance of Co-MOF-74,

quasi-Co-MOF-74 and CoP@quasi-Co-MOF-74.

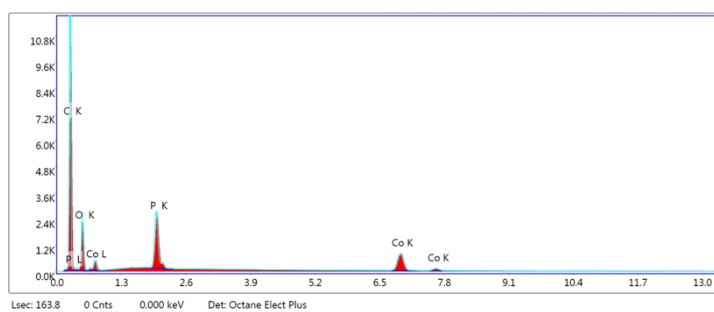

**Fig. S3** EDS spectrum of CoP@quasi-Co-MOF-74

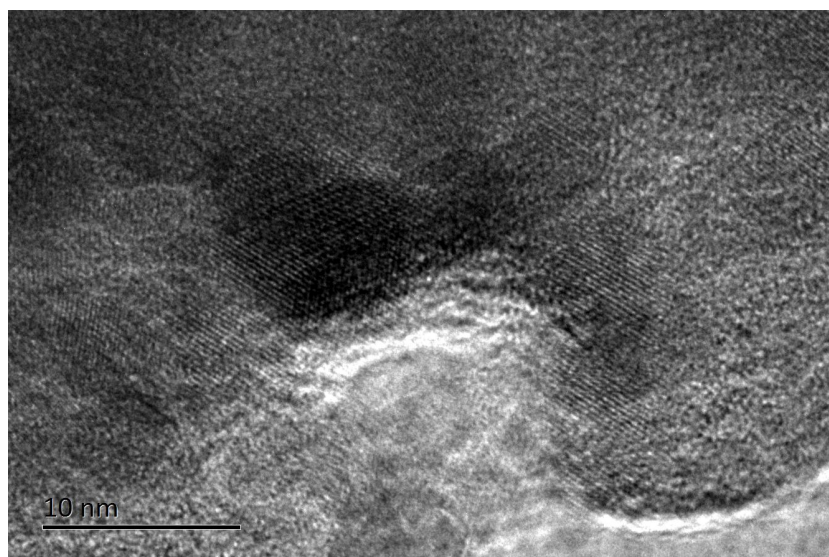

**Fig. S4** HRTEM image of CoP@quasi-Co-MOF-74

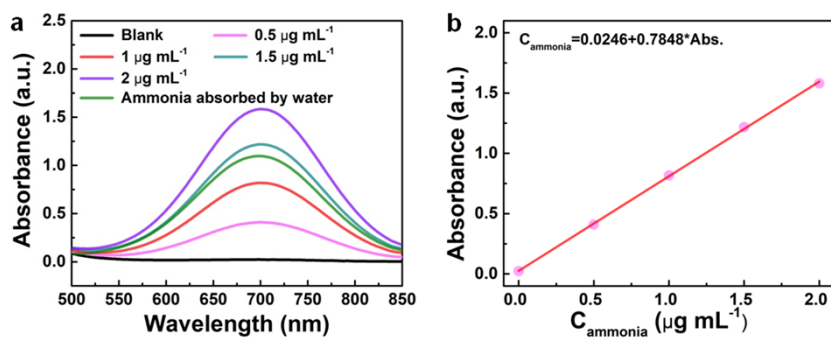

**Fig. S5** (a) UV-vis spectra of solutions with different ammonia concentrations. (b) Standard curve

for ammonia detection.

### Determination of the ammonia

Ammonia is easily soluble while hydrogen is insoluble in water, so ammonia from the mixed gas can be absorbed by water. Ammonia in water was determined by the indophenol blue method.<sup>1</sup> The evolved ammonia was absorbed with 20 mL deionized water. For detection, 0.3 g sodium hydroxide in 9.675 mL water is added to 0.325 mL sodium hypochlorite to obtain solution A, while solution B was prepared by added 0.128 g sodium hydroxide and 0.6404 g  $C_7H_5NaO_3$  in 20 mL water. Then, 50  $\mu$ L solution A, 500  $\mu$ L solution B and 50  $\mu$ L of sodium nitrate ferrocyanide solution (10 mg  $mL^{-1}$ ) were added to 4 mL of absorbed water. After 2 h, solution color was changed from yellow to blue-green, and the presence of ammonia can be detected by UV-visible spectroscopy at a maximum absorption wavelength of 698 nm.

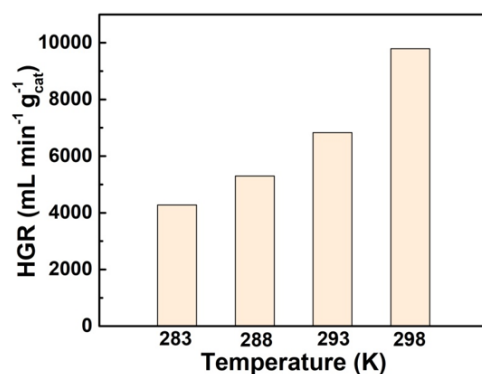

**Fig. S6** Effect of reaction temperature on the HGR over CoP@quasi-Co-MOF-74

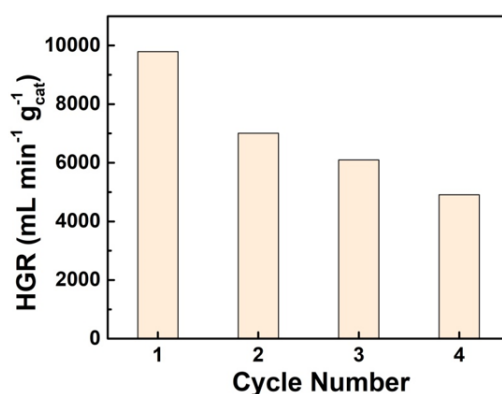

**Fig. S7** HGR of CoP@quasi-Co-MOF-74 for catalytic AB hydrolysis for recyclability

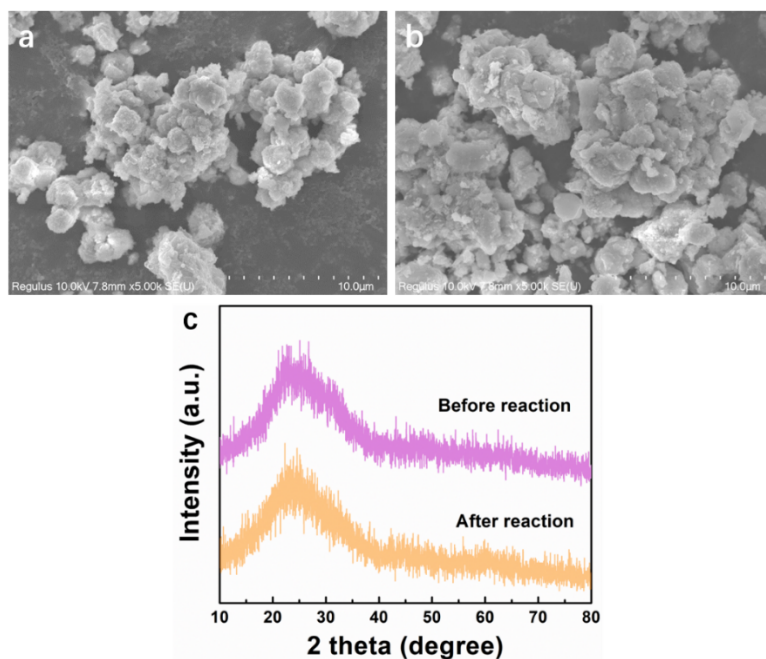

**Fig. S8** (a,b) SEM images and (c) XRD pattern of CoP@quasi-Co-MOF-74 after reaction

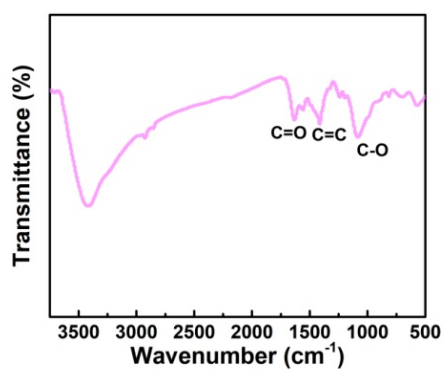

**Fig. S9** FTIR spectrum of CoP@quasi-Co-MOF-74 after reaction.

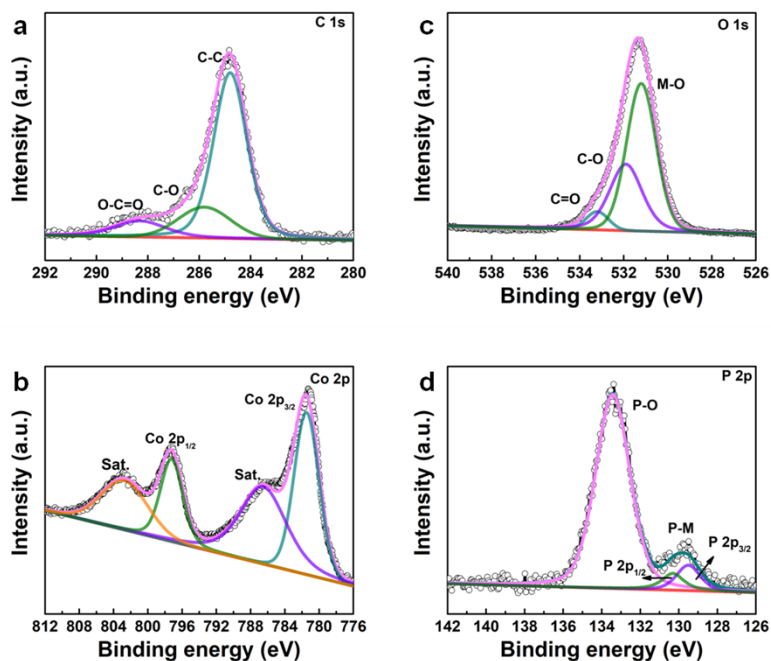

**Fig. S10** XPS spectra of CoP@quasi-Co-MOF-74 after reaction: (a) C 1s, (b) O 1s, (c) Co 2p, (d) P 2p.

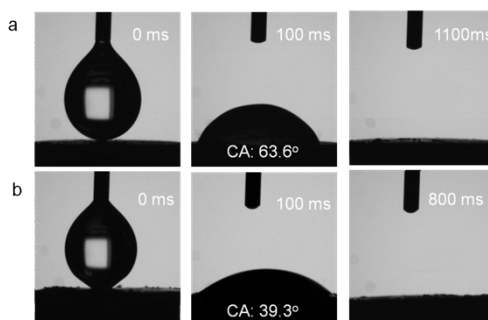

**Fig. S11** Water contact angles of (a) Co-MOF-74 and (b) CoP@quasi-Co-MOF-74.

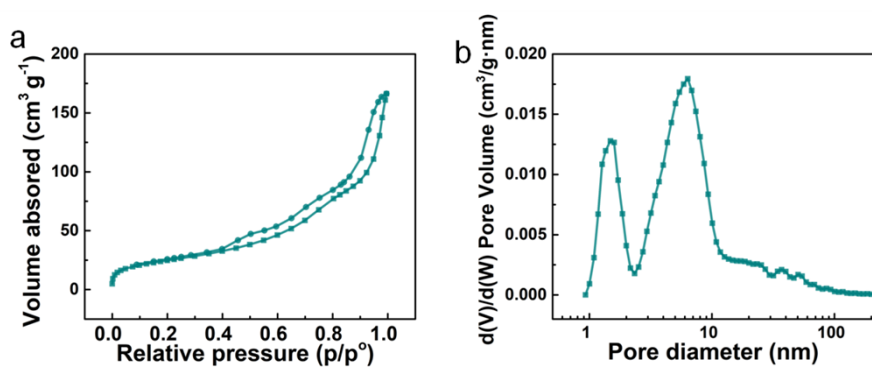

**Fig. S12** (a) N<sub>2</sub> adsorption-desorption isotherms and (b) pore-size distribution curve of CoP@quasi-Co-MOF-74.

**Table S1** Comparison of HGR for catalytic hydrolysis of AB by different cobalt-based materials

| Catalyst                                           | HGR (mL min <sup>-1</sup> g <sub>cat</sub> <sup>-1</sup> ) | Reference |
|----------------------------------------------------|------------------------------------------------------------|-----------|
| CoP@quasi-Co-MOF-74                                | 9790                                                       | This Work |
| Co-NC/NF <sub>600</sub>                            | 1176                                                       | 2         |
| Co-Ni-B/PAC                                        | 1451.2                                                     | 3         |
| S <sub>Co</sub> <sub>0.43</sub> Cu <sub>0.57</sub> | 2228.9                                                     | 4         |
| Co/NPCNW                                           | 2638                                                       | 5         |
| Co-W-B                                             | 3327.7                                                     | 6         |
| Co-Mo-B/CC-F                                       | 3916.1                                                     | 7         |
| CoB                                                | 4880                                                       | 8         |
| Co-B                                               | 5500                                                       | 9         |
| Co-CoO <sub>x</sub> @NCS-II                        | 5562                                                       | 10        |
| Co-CoO <sub>x</sub> @GO-II                         | 5813                                                       | 11        |
| Co-Mo-B/NF                                         | 6027.1                                                     | 11        |
| Co <sub>40</sub> Cu <sub>60</sub> @S16LC-20        | 6570                                                       | 12        |
| Co-Co <sub>3</sub> O <sub>4</sub> /CDs             | 6816                                                       | 13        |
| PEI-GO3D/Co                                        | 7680                                                       | 14        |

**Table S2** Comparison of TOF and E<sub>a</sub> for catalytic hydrolysis of AB by different cobalt-based materials

| Catalyst                               | TOF (min <sup>-1</sup> ) | E <sub>a</sub> (kJ mol <sup>-1</sup> ) | Reference |
|----------------------------------------|--------------------------|----------------------------------------|-----------|
| CoP@quasi-Co-MOF-74                    | 55.86                    | 38.22                                  | This Work |
| Co-NC/NF <sub>600</sub>                | 3                        | 64                                     | 2         |
| Co/NPCNW                               | 7.3                      | 25.4                                   | 5         |
| CoB                                    | 4.88                     | 16.2                                   | 8         |
| Co-Co <sub>3</sub> O <sub>4</sub> /CDs | 17.93                    | 40                                     | 13        |
| Co/HPC                                 | 7.3                      | 32.8                                   | 15        |
| Co/NC-50                               | 7.6                      | 44.9                                   | 16        |
| Co@SiO <sub>2</sub>                    | 13.3                     | 42                                     | 17        |

|                                         |       |        |    |
|-----------------------------------------|-------|--------|----|
| Co@Co <sub>2</sub> P/N-CNP              | 18.4  | 32.1   | 18 |
| CoP/HPC-500                             | 27.7  | 42.545 | 19 |
| CoBP/NGH                                | 32.8  | 39.42  | 20 |
| CuO-Co <sub>3</sub> O <sub>4</sub>      | 33.4  | 39.6   | 21 |
| Ni <sub>0.13</sub> Co <sub>0.87</sub> P | 47.5  | 41.8   | 22 |
| Ni <sub>0.7</sub> Co <sub>1.3</sub> P   | 58.4  | 43.2   | 23 |
| CoP-CoO/NCDS                            | 89.56 | 41     | 24 |

## References

- Z. Wang, M. Li, P. Wang, K. Deng, H. Yu, X. Wang, Y. Xu, H. Wang, and L. Wang, *Chem. Eng. J.*, 2022, 449, 137771.
- S. Mehdi, Y. Liu, H. Wei, H. Wen, R. Shen, Z. Peng, H. Zhang, X. Wu, C. Wang and S. Guan, *ACS Appl. Nano Mater.*, 2022, 5, 5064-5074.
- Y. Zou, Y. Gao, C. Xiang, H. Chu, S. Qiu, E. Yan, F. Xu, C. Tang and L. Sun, *Metals*, 2016, 6, 154.
- C. Wang, L. Li, X. Yu, Z. Lu, X. Zhang, X. Wang, X. Yang and J. Zhao, *ACS Sustain. Chem. Eng.* 2020, 8, 8256-8266.
- L. Zhou, J. Meng, P. Li, Z. Tao, L. Mai and J. Chen, *Mater. Horiz.*, 2017, 4, 268-273.
- C. Li, D. Wang, Y. Wang, G. Li, G. Hu, S. Wu, Z. Cao and K. Zhang, *J Colloid Interf. Sci.*, 2018, 524, 25-31.
- Y. Wang, K. Zou, D. Zhang, G. Li, W. Meng, D. Wang, Z. Cao, K. Zhang and S. Wu, *Int. J. Hydrogen Energy*, 2020, 45, 14418-14427.
- J. Yan, J. Liao, H. Li, H. Wang and R. Wang, *Catal. Commun.*, 2016, 84, 124-128.
- Y. Wang, W. Meng, D. Wang, G. Li, S. Wu, Z. Cao, K. Zhang, C. Wu and S. Liu, *Int. J. Hydrogen Energy*, 2017, 42, 30718-30726.
- H. Zhang, Y. Fan, B. Liu, Y. Liu, S. Ashraf, X. Wu, G. Han, J. Gao, B. Li, *ACS Sustain. Chem. Eng.* 2019, 7, 9782-9792.
- Y. Sang, X. Cao, G. Dai, L. Wang, Y. Peng and B. Geng, *J. Hazard. Mater.*, 2020, 381, 120942.
- J. R. Deka, D. Saikia, N.-F. Lu, K.-T. Chen, H.-M. Kao and Y.-C. Yang, *Appl. Surf. Sci.*, 2021, 538, 148091.
- H. Wu, M. Wu, B. Wang, X. Yong, Y. Liu, B. Li, B. Liu and S. Lu, *J. Energy. Chem.*, 2020, 48, 43-53.
- M. Li, J. Hu and H. Lu, *Catal. Sci. Technol.*, 2016, 6, 7186-7192.
- X.-L. Zhang, D.-X. Zhang, G.-G. Chang, X.-C. Ma, J. Wu, Y. Wang, H.-Z. Yu, G. Tian, J. Chen and X.-Y. Yang, *Ind. Eng. Chem. Res.*, 2019, 58, 7209-7216.
- S. L. Zacho, J. Mielby and S. Kegnæs, *Catal. Sci. Technol.*, 2018, 8, 4741-4746.
- Ö. Metin, M. Dinc, Z. S. Eren and S. Özkaz, *Int. J. Hydrogen Energy.*, 2011, 36, 11528-11535.
- C. Wang, Z. Wang, H. Wang, Y. Chi, M. Wang, D. Cheng, J. Zhang, C. Wu and Z. Zhao, *Int. J. Hydrogen Energy*, 2021, 46, 9030-9039.
- X. C. Ma, Y. Y. He, D. X. Zhang, M. J. Chen, S. C. Ke, Y. X. Yin and G. G. Chang,



- ChemistrySelect.*, 2020, 5, 2190-2196.
20. Y. Men, J. Su, X. Du, L. Liang, G. Cheng and W. Luo, *J Alloy Compd*, 2018, 735, 1271-1276.
  21. J. Liao, Y. Feng, X. Zhang, L. Huang, S. Huang, M. Liu, Q. Liu and H. Li, *ACS Appl. Nano Mater.*, 2021, 4, 7640-7649.
  22. C. Xiong, X. Zhang, Y. Lei, L. Zhang, H. Shang, B. Zhang and Y. Zhao, *Appl. Clay Sci.*, 2021, 214, 106293.
  23. C.-C. Hou, Q. Li, C.-J. Wang, C.-Y. Peng, Q.-Q. Chen, H.-F. Ye, W.-F. Fu, C.-M. Che, N. López and Y. Chen, *Energ. Environ. Sci.*, 2017, 10, 1770-1776.
  24. H. Wu, Y. Cheng, B. Wang, Y. Wang, M. Wu, W. Li, B. Liu and S. Lu, *J. Energy Chem.*, 2021, 57, 198-205.
